# Supplementary material
Source: PubMed Central journal article supplement (PMC6396308)
Supplement: NIHMS1519017-supplement-3CA1C5B04BA0113C9CE9450AB8C081CC.pdf [file NIHMS1519017-supplement-3CA1C5B04BA0113C9CE9450AB8C081CC.pdf]

Supplemental Table 1. Names and cancer classifications of chemicals linked to artificial turf with no predicted carcinogenicity (n=109).

| CASRN    | Name                                    | USEPA Cancer Classification <sup>a</sup> | ECHA Cancer Classification |
|----------|-----------------------------------------|------------------------------------------|----------------------------|
| 120821   | 1,2,4-Trichlorobenzene                  | Not Classifiable                         | --                         |
| 95501    | 1,2-Dichlorobenzene                     | Not Classifiable                         | --                         |
| 57556    | 1,2-propanediol                         | --                                       | --                         |
| 78795    | 1,3-Butadiene, 2-methyl-                | --                                       | Presumed Human Carcinogen  |
| 541731   | 1,3-Dichlorobenzene                     | Not Classifiable                         | --                         |
| 106467   | 1,4-Dichlorobenzene                     | --                                       | Suspected Human Carcinogen |
| 592767   | 1-Heptene                               | --                                       | --                         |
| 56728100 | 1-Hexene, 3,4,5-trimethyl-              | --                                       | --                         |
| 16106595 | 1-Hexene, 4,5-dimethyl-                 | --                                       | --                         |
| 73105676 | 1-Iodo-2-methylundecane                 | --                                       | --                         |
| 115117   | 1-Propene, 2-methyl-                    | --                                       | --                         |
| 55402136 | 2,2,- Trimethyl-3-Octyne                | --                                       | --                         |
| 13475826 | 2,2,4,6,6-Pentamethylheptane            | --                                       | --                         |
| 104767   | 2-Ethyl-1-hexanol                       | --                                       | --                         |
| 591764   | 2-Methylhexane                          | --                                       | --                         |
| 18409171 | 2-Octen-1-ol, (E)-                      | --                                       | --                         |
| 67630    | 2-Propanol                              | --                                       | --                         |
| 22632593 | 2-Propyl-methyl pentanoic acid          | --                                       | --                         |
| 1620980  | 3,5-Di-tert-Butyl-4-hydroxybenzaldehyde | --                                       | --                         |
| 13466789 | 3-Carene                                | --                                       | --                         |
| 4748781  | 4-Ethylbenzaldehyde                     | --                                       | --                         |
| 598016   | 4-Methyl-4-Heptanol                     | --                                       | --                         |
| 140669   | 4-Tert-octylphenol                      | --                                       | --                         |
| 54774275 | 5-Hexen-2-ol, (+/-)-                    | --                                       | --                         |
| 1490046  | 5-Methyl-2-(1-methylethyl)cyclohexanol  | --                                       | --                         |
| 10458147 | 5-Methyl-2-isopropyl cyclohexanone      | --                                       | --                         |

|                 |                                  |                           |    |
|-----------------|----------------------------------|---------------------------|----|
| <b>25117322</b> | 5-Methyltetradecane              | --                        | -- |
| <b>64197</b>    | Acetic acid                      | --                        | -- |
| <b>67641</b>    | Acetone                          | Inadequate Information    | -- |
| <b>80568</b>    | Alpha pinene                     | --                        | -- |
| <b>117817</b>   | Bis(2-ethylhexyl) Phthalate      | Probable Human Carcinogen | -- |
| <b>594387</b>   | Butane, 2-iodo-2-methyl-         | Inadequate Information    | -- |
| <b>78784</b>    | Butane, 2-methyl-                | --                        | -- |
| <b>56264983</b> | Butenylbenzene                   | --                        | -- |
| <b>25013165</b> | Butylated hydroxyanisole         | --                        | -- |
| <b>128370</b>   | Butylated hydroxytoluene         | --                        | -- |
| <b>3073663</b>  | Cyclohexane, 1,1,3-trimethyl-    | --                        | -- |
| <b>638040</b>   | Cyclohexane, 1,3-dimethyl-, cis- | --                        | -- |
| <b>589902</b>   | Cyclohexane, 1,4-dimethyl-       | --                        | -- |
| <b>1678917</b>  | Cyclohexane, ethyl-              | --                        | -- |
| <b>108930</b>   | Cyclohexanol                     | --                        | -- |
| <b>1120725</b>  | Cyclopentanone, 2-methyl-        | --                        | -- |
| <b>541026</b>   | Decamethyl cyclopentasiloxane    | --                        | -- |
| <b>124185</b>   | Decane                           | --                        | -- |
| <b>62238146</b> | Decane, 2,3,8-trimethyl-         | --                        | -- |
| <b>62108230</b> | Decane, 2,5,6-trimethyl-         | --                        | -- |
| <b>13151354</b> | Decane, 5-methyl-                | --                        | -- |
| <b>1002171</b>  | Decane, 6-ethyl-2-methyl-        | --                        | -- |
| <b>1321740</b>  | Diethenylbenzene                 | --                        | -- |
| <b>84662</b>    | Diethyl phthalate                | Not Classifiable          | -- |
| <b>134623</b>   | Diethyltoluamide                 | --                        | -- |
| <b>84742</b>    | Di-n-butyl Phthalate             | Not Classifiable          | -- |
| <b>117840</b>   | Di-n-octyl Phthalate             | --                        | -- |
| <b>629970</b>   | Docosane                         | --                        | -- |
| <b>112549</b>   | Dodecanal                        | --                        | -- |

|                 |                                |                                            |                            |
|-----------------|--------------------------------|--------------------------------------------|----------------------------|
| <b>31295564</b> | Dodecane, 2,6,11-trimethyl-    | --                                         | --                         |
| <b>74645980</b> | Dodecane, 2,7,10-trimethyl-    | --                                         | --                         |
| <b>629787</b>   | Heptadecane                    | --                                         | --                         |
| <b>142825</b>   | Heptane                        | Not Classifiable                           | --                         |
| <b>1071267</b>  | Heptane, 2,2-dimethyl-         | --                                         | --                         |
| <b>52896954</b> | Heptane, 2,3,4-trimethyl-      | --                                         | --                         |
| <b>2213232</b>  | Heptane, 2,4-dimethyl-         | --                                         | --                         |
| <b>2216300</b>  | Heptane, 2,5-dimethyl-         | --                                         | --                         |
| <b>1072055</b>  | Heptane, 2,6-dimethyl-         | --                                         | --                         |
| <b>592278</b>   | Heptane, 2-methyl-             | --                                         | --                         |
| <b>589811</b>   | Heptane, 3-methyl-             | --                                         | --                         |
| <b>52896874</b> | Heptane, 4-(1-methylethyl)-    | --                                         | --                         |
| <b>118741</b>   | Hexachlorobenzene              | Probable Human Carcinogen                  | Presumed Human Carcinogen  |
| <b>77474</b>    | Hexachlorocyclopentadiene      | Evidence for Non-Carcinogenicity in Humans | --                         |
| <b>544763</b>   | Hexadecane                     | --                                         | --                         |
| <b>111068</b>   | Hexadecanoic acid, butyl ester | --                                         | --                         |
| <b>110543</b>   | Hexane                         | Inadequate Information                     | --                         |
| <b>16747265</b> | Hexane, 2,2,4-trimethyl-       | --                                         | --                         |
| <b>3522949</b>  | Hexane, 2,2,5-trimethyl-       | --                                         | --                         |
| <b>563166</b>   | Hexane, 3,3-dimethyl-          | --                                         | --                         |
| <b>589344</b>   | Hexane, 3-methyl-              | --                                         | --                         |
| <b>78831</b>    | Isobutyl alcohol               | --                                         | --                         |
| <b>78591</b>    | Isophorone                     | Possible Human Carcinogen                  | Suspected Human Carcinogen |
| <b>98828</b>    | Isopropylbenzene               | Not Classifiable                           | --                         |
| <b>475207</b>   | Junipene (longifolene)         | --                                         | --                         |
| <b>138863</b>   | Limonene                       | --                                         | --                         |
| <b>112618</b>   | Methyl stearate                | --                                         | --                         |
| <b>111842</b>   | Nonane                         | --                                         | --                         |

|                 |                                                          |                           |                            |
|-----------------|----------------------------------------------------------|---------------------------|----------------------------|
| <b>31081182</b> | Nonane, 3-methyl-5-propyl-                               | --                        | --                         |
| <b>593453</b>   | Octadecane                                               | --                        | --                         |
| <b>57114</b>    | Octadecanoic Acid / Stearic Acid                         | --                        | --                         |
| <b>111659</b>   | Octane                                                   | --                        | --                         |
| <b>3221612</b>  | Octane, 2-methyl-                                        | --                        | --                         |
| <b>2216333</b>  | Octane, 3-methyl-                                        | --                        | --                         |
| <b>112801</b>   | Oleic Acid                                               | --                        | --                         |
| <b>87865</b>    | Pentachlorophenol (PCP)                                  | Likely to be carcinogenic | Suspected Human Carcinogen |
| <b>629629</b>   | Pentadecane                                              | --                        | --                         |
| <b>1186534</b>  | Pentane, 2,2,3,4-tetramethyl-                            | --                        | --                         |
| <b>107835</b>   | Pentane, 2-methyl-                                       | --                        | --                         |
| <b>562492</b>   | Pentane, 3,3-dimethyl-                                   | --                        | --                         |
| <b>52181778</b> | Pentenylbenzene                                          | --                        | --                         |
| <b>88244</b>    | Phenol, 2,2'-methylenebis(6-(1,1-dimethylethyl)-4-ethyl- | --                        | --                         |
| <b>75285</b>    | Propane, 2-methyl-                                       | --                        | --                         |
| <b>135988</b>   | sec-Butylbenzene                                         | --                        | --                         |
| <b>629594</b>   | Tetradecane                                              | --                        | --                         |
| <b>544638</b>   | Tetradecanoic acid                                       | --                        | --                         |
| <b>14167590</b> | Tetratriacontane                                         | --                        | --                         |
| <b>629505</b>   | Tridecane                                                | --                        | --                         |
| <b>1120214</b>  | Undecane                                                 | --                        | --                         |
| <b>17301234</b> | Undecane, 2,6-dimethyl-                                  | --                        | --                         |
| <b>1002433</b>  | Undecane, 3-methyl-                                      | --                        | --                         |
| <b>17312822</b> | Undecane, 4,6-dimethyl-                                  | --                        | --                         |
| <b>2980690</b>  | Undecane, 4-methyl-                                      | --                        | --                         |
| <b>17615917</b> | Undecane, 5,6-dimethyl-                                  | --                        | --                         |

CASRN, chemical abstract registry number; ECHA, European Chemicals Agency; USEPA, United States Environmental Protection Agency

<sup>a</sup> Differences in classification descriptors reflect the 1986 EPA Hazard Assessment Guidelines versus 2005 EPA Carcinogen Risk Assessment Guidelines.
